# Supplementary material
Source: publisher figshare collection journal article supplement (https://gsajournals.figshare.com/ndownloader/files/18044759)
Supplement: Supplementary file 1 [file 18044759]

## Sheet: Sheet1
Distance (Mb)	Ratio of normalized link counts in 2Rd/2Rd:2Rd+/2Rd+		Ratio of normalized link counts in 2Rd+/2Rd:2Rd+/2Rd+
	Quad. 2	Quad. 4	Quad. 2	Quad. 4
0.5	1.14	0.99	12.2	3.25
1	1.02	1.05	4.04	2.67
1.5	1.08	1.07	3.22	2.32
2	1.06	0.96	2.49	1.97
